# Supplementary material
Source: publisher site journal article supplement (https://www.dovepress.com/article/575413)
Supplement: Supplementary file 1 [file 575413%20Revised%20Supplementary%20Table%201.docx]

**Supplementary table 1 Validation of different classification based on MRI for preoperative serum CA125**

| Variable | Subtype 1 | Subtype 2 | Subtype 3 | Subtype 4 | Subtype 5 | Subtype 6 | Test value | P |
| --- | --- | --- | --- | --- | --- | --- | --- | --- |
| Classification 4 | 20 (12.0,42.0) | 33.5(13.7,61.8) | 55(30,108) | 93(51-) | 35(26.3,67.8) | 59(34,123) | 22.003 | ＜0.001 |

Abbreviations: MRI-Based classification systems of adenomyosis refers to two of our previous papers.
